# Supplementary material for: Coastal flood impacts and lost ecosystem services along Europe’s outermost regions and overseas countries and territories
Source: Springer Nature journal article supplement (doi:10.1038/s41467-025-66391-7), 2026-01-07
Supplement: MOESM1 [file 41467_2025_66391_MOESM1_ESM.pdf]

## **Description of Additional Supplementary Files**

File Name: Supplementary Data 1

Description: Impacts from coastal floods along Europe's OCTs and ORs under four scenarios ('low-emissions' (SSP1-2.6), 'moderate-emissions' (SSP2-4.5), 'high-emissions' (SSP3-7.0) and 'very-high-emissions (SSP5-8.5)). Variables shown in separate spreadsheets: Expected Annual Damage (damageTOTAL-mEUR), Expected Annual Population Exposed (populationTOTAL-number of people), Expected Annual Flooded Area (floodAreaTOTAL-km<sup>2</sup>) and Expected Annual Value of Lost Ecosystem Services (ecoLost-mEUR). The values express the ensemble median projections and the 5<sup>th</sup>-95<sup>th</sup> confidence interval (brackets). Data are provided for the years 2020, 2050, 2100 and 2150.
